# Supplementary material
Source: PubMed Central journal article supplement (PMC4104277)
Supplement: NIHMS597350-supplement-Supporting_Information.pdf [file NIHMS597350-supplement-Supporting_Information.pdf]

## Supplemental Materials

**Table A1:** Averaged peaks retention times and abundances for viral infected cell lines at 24 hours exposure. R.T.: retention time (min.), A.: abundance (a.u.), D.P.: discriminating peaks (p<0.05). Any two cell lines that have a same letter in their D.P. column are mutually distinguishable. ‘--’: either no peak or not detected by the peak criteria. (\*): standard deviation].

| Peak No.   | Cntrl           |                    |                | MOI 1 H1N1      |                    |                | MOI 10 H1N1     |                    |                | MOI 10 H6N2     |                    |                | MOI 10 H9N2     |                   |                | Tentative Chemical ID (alternative structure(s))                                                          |
|------------|-----------------|--------------------|----------------|-----------------|--------------------|----------------|-----------------|--------------------|----------------|-----------------|--------------------|----------------|-----------------|-------------------|----------------|-----------------------------------------------------------------------------------------------------------|
|            | R.T.            | A.                 | D.P.           | R.T.            | A.                | D.P.           |                                                                                                           |
| 1          | 1.43<br>(0.04)  | 146783<br>(134582) |                | 1.44<br>(0.03)  | 187363<br>(103803) | g.             | 1.46<br>(0.00)  | 182485<br>(101271) |                | 1.46<br>(0.00)  | 226571<br>(154656) | j.             | 1.46<br>(0.01)  | 112734<br>(62588) | g, j.          | Carbon dioxide                                                                                            |
| 2-<br>C1   | 1.92<br>(0.12)  | 10047<br>(3800)    | a, b,<br>c, d. | 2.05<br>(0.04)  | 18975<br>(5286)    | a, e,<br>f, g. | 2.07<br>(0.01)  | 34638<br>(7187)    | b, e,<br>h, i. | 2.06<br>(0.01)  | 53071<br>(6207)    | c, f,<br>h, j. | 2.07<br>(0.00)  | 27768<br>(4821)   | d, g,<br>i, j. | 2-methoxy-ethanol                                                                                         |
| 3          | 2.50<br>(0.05)  | 9148<br>(1859)     | d.             | 2.51<br>(0.04)  | 9882<br>(1794)     |                | --              | --                 |                | 2.51<br>(0.07)  | 11372<br>(4022)    |                | 2.55<br>(0.06)  | 11777<br>(3259)   | d.             | Isopropanol                                                                                               |
| 4-<br>C2   | 3.87<br>(0.04)  | 25721<br>(14735)   |                | 3.86<br>(0.03)  | 33571<br>(13207)   | g.             | 3.90<br>(0.01)  | 35777<br>(19539)   |                | 3.90<br>(0.01)  | 31622<br>(11886)   |                | 3.90<br>(0.01)  | 23009<br>(9401)   | g.             | Thiirane                                                                                                  |
| 5-<br>C3   | --              | --                 |                | 5.96<br>(0.09)  | 109624<br>(136496) | e, f,<br>g.    | 6.09<br>(0.07)  | 15356<br>(13469)   | e.             | 6.11<br>(0.09)  | 15183<br>(8325)    | f.             | 6.06<br>(0.09)  | 14263<br>(4506)   | g.             | Propanoic acid, ethyl ester                                                                               |
| 6-<br>C4   | 12.62<br>(0.08) | 8601<br>(2233)     | a, b,<br>c, d. | 12.62<br>(0.03) | 18629<br>(7844)    | a, f.          | 12.71<br>(0.03) | 17975<br>(4401)    | b, h.          | 12.69<br>(0.03) | 30312<br>(12957)   | c, f,<br>h, j. | 12.71<br>(0.03) | 15104<br>(5906)   | d, j.          | Butanoic acid, 2-methyl-, methyl ester                                                                    |
| 7-<br>C5   | 19.71<br>(0.07) | 10925<br>(2735)    | c, d.          | 19.75<br>(0.05) | 11214<br>(1939)    | f, g.          | 19.79<br>(0.09) | 8924<br>(3672)     |                | 19.85<br>(0.07) | 8271<br>(3269)     | c, f.          | 19.87<br>(0.04) | 7127<br>(1269)    | d, g.          | Butanoic acid, 2-methyl-, ethyl ester                                                                     |
| 8          | 22.25<br>(0.07) | 10726<br>(3997)    | d.             | 22.27<br>(0.07) | 11983<br>(4571)    | g.             | --              | --                 |                | 22.42<br>(0.08) | 8181<br>(5616)     |                | 22.43<br>(0.08) | 5748<br>(1357)    | d, g.          | Octane (Nonane)                                                                                           |
| 9          | 23.56<br>(0.05) | 8462<br>(1779)     | b.             | --              | --                 |                | 23.64<br>(0.03) | 7310<br>(509)      | b.             | 23.63<br>(0.04) | 8170<br>(1540)     |                | 23.63<br>(0.04) | 7857<br>(1097)    |                | 4-Ethylbenzoic acid, 2-butyl ester (4-formylbenzoic acid, ethyl ester)                                    |
| 10-<br>C6  | 30.13<br>(0.04) | 10292<br>(3091)    | a, b,<br>c.    | 30.11<br>(0.06) | 18579<br>(7496)    | a, g.          | 30.26<br>(0.04) | 13955<br>(3882)    | b, h,<br>i.    | 30.25<br>(0.04) | 23767<br>(13960)   | c, h,<br>j.    | 30.26<br>(0.04) | 10047<br>(2748)   | g, i,<br>j.    | 3-Hexanone, 5-methyl-                                                                                     |
| 11         | --              | --                 |                | 31.59<br>(0.06) | 7670<br>(1371)     | e, g.          | 31.72<br>(0.04) | 5233<br>(865)      | e.             | 31.71<br>(0.05) | 6102<br>(3247)     |                | 31.71<br>(0.03) | 5124<br>(652)     | g.             | o-Xylene (p-Xylene)                                                                                       |
| 12-<br>C7  | --              | --                 |                | 35.43<br>(0.06) | 9945<br>(1756)     | e, f,<br>g.    | 35.59<br>(0.03) | 6493<br>(772)      | e.             | 35.59<br>(0.04) | 7526<br>(2329)     | f.             | 35.58<br>(0.04) | 6829<br>(1452)    | g.             | 3-Heptanone                                                                                               |
| 13-<br>C8  | --              | --                 |                | 36.06<br>(0.11) | 7882<br>(842)      | e, f,<br>g.    | 36.25<br>(0.05) | 6463<br>(778)      | e.             | 36.27<br>(0.05) | 6569<br>(1613)     | f.             | 36.24<br>(0.05) | 5955<br>(528)     | g.             | 2-Octanone                                                                                                |
| 14         | 46.14<br>(0.04) | 10404<br>(2318)    | c, d.          | 46.10<br>(0.07) | 9922<br>(1506)     | f, g.          | 46.30<br>(0.06) | 8301<br>(3177)     |                | 46.31<br>(0.04) | 8228<br>(1789)     | c, f.          | 46.30<br>(0.04) | 7760<br>(1206)    | d, g.          | Benzaldehyde                                                                                              |
| 15-<br>C9  | 48.10<br>(0.08) | 10895<br>(5148)    |                | 48.10<br>(0.09) | 9703<br>(2285)     | e, f,<br>g.    | 48.16<br>(0.05) | 13743<br>(6077)    | e.             | 48.17<br>(0.07) | 13705<br>(4113)    | f.             | 48.15<br>(0.04) | 13617<br>(3724)   | g.             | Not identified                                                                                            |
| 16         | 49.10<br>(0.05) | 8023<br>(1342)     | d.             | 49.09<br>(0.07) | 7883<br>(1102)     |                | 49.30<br>(0.07) | 7074<br>(1950)     |                | --              | --                 |                | 49.30<br>(0.06) | 6822<br>(1440)    | d.             | 1-Heptanol                                                                                                |
| 17         | --              | --                 |                | 53.07<br>(0.07) | 7533<br>(822)      | e, f,<br>g.    | 53.24<br>(0.04) | 6350<br>(650)      | e.             | 53.25<br>(0.05) | 6454<br>(1573)     | f.             | 53.24<br>(0.04) | 6179<br>(974)     | g.             | Not identified                                                                                            |
| 18         | --              | --                 |                | 57.23<br>(0.07) | 7272<br>(973)      | f, g.          | 57.41<br>(0.04) | 6267<br>(1843)     |                | 57.40<br>(0.05) | 6073<br>(1417)     | f.             | 57.39<br>(0.05) | 6072<br>(1194)    | g.             | Not identified                                                                                            |
| 19-<br>C10 | 67.17<br>(0.05) | 22904<br>(3975)    | b, c,<br>d.    | 67.20<br>(0.06) | 22780<br>(3323)    | e, f,<br>g.    | 67.34<br>(0.04) | 14834<br>(4705)    | b, e.          | 67.35<br>(0.04) | 14875<br>(3667)    | c, f.          | 67.33<br>(0.04) | 13788<br>(2653)   | d, g.          | 1-Phenyl-1-butene (1-ethenyl-4-ethyl-Benzene, 1-ethenyl-3-ethyl-Benzene, 1-methyl-4-(2-propenyl)-Benzene) |
| 20-        | 68.59           | 18440              | b, c.          | 68.59           | 17319              | e, f.          | 68.76           | 11818              | b, e.          | 68.77           | 11820              | c, f.          | 68.76           | 11314             | d, g.          | 1-Phenyl-1-butene (1-ethenyl-4-                                                                           |

|            |                 |                  |       |                 |                 |             |                 |                   |       |                 |                  |       |                 |                 |       |                                                                            |
|------------|-----------------|------------------|-------|-----------------|-----------------|-------------|-----------------|-------------------|-------|-----------------|------------------|-------|-----------------|-----------------|-------|----------------------------------------------------------------------------|
| C11        | (0.06)          | (4064)           | d,    | (0.06)          | (3374)          | g,          | (0.04)          | (3835)            |       | (0.05)          | (2142)           |       | (0.03)          | (2118)          |       | ethyl-Benzene, 1-ethenyl-3-ethyl-Benzene, 1-methyl-4-(2-propenyl)-Benzene) |
| 21         | --              | --               |       | --              | --              |             | 69.25<br>(0.05) | 9487<br>(2036)    | i,    | 69.24<br>(0.04) | 10765<br>(4045)  | j,    | 69.24<br>(0.04) | 7184<br>(1790)  | i, j, | Benzoic acid, methyl ester                                                 |
| 22-<br>C12 | 70.92<br>(0.06) | 9138<br>(2726)   | b,    | 70.92<br>(0.07) | 8959<br>(1387)  | e,          | 71.11<br>(0.03) | 7200<br>(1726)    | b, e, | 71.12<br>(0.04) | 7978<br>(1823)   |       | 71.11<br>(0.05) | 7729<br>(1855)  |       | 3,7-dimethyl-3-Octanol                                                     |
| 23         | 74.71<br>(0.06) | 19220<br>(31982) |       | 74.71<br>(0.07) | 9778<br>(3313)  | f,          | 74.90<br>(0.04) | 47013<br>(141880) |       | 74.89<br>(0.04) | 6391<br>(1383)   | f,    | 74.89<br>(0.04) | 7673<br>(3784)  |       | Not identified                                                             |
| 24-<br>C13 | 79.81<br>(0.06) | 15112<br>(4098)  | c, d, | 79.82<br>(0.07) | 13800<br>(2201) | f, g,       | 80.02<br>(0.04) | 11344<br>(8837)   |       | 80.02<br>(0.03) | 9559<br>(1669)   | c, f, | 80.00<br>(0.03) | 9119<br>(1420)  | d, g, | 4-ethyl-Benzaldehyde                                                       |
| 25-<br>C14 | 88.63<br>(0.07) | 15356<br>(23190) |       | 88.61<br>(0.04) | 7988<br>(2512)  | e, f,<br>g, | 88.78<br>(0.14) | 28348<br>(15442)  | e,    | 88.82<br>(0.10) | 23635<br>(13835) | f,    | 88.87<br>(0.04) | 18743<br>(6348) | g,    | Decanal (isomers, homologs)                                                |

**Table A2:** Averaged peaks retention times and abundances for viral infected cell lines at 48 hours exposure. R.T.: retention time (min.). A.: abundance (a.u.), D.P.: discriminating peaks (p<0.05). Any two cell lines that have a same letter in their D.P. column are mutually distinguishable. ‘--’: either no peak or not detected by the peak criteria. (\*): standard deviation].

| Peak No. | Cntrl           |                    |             | MOI 1 H1N1      |                   |             | MOI 10 H1N1     |                    |             | MOI 10 H6N2     |                    |             | MOI 10 H9N2     |                    |             | Tentative Chemical ID (alternative structure(s))                                                          |
|----------|-----------------|--------------------|-------------|-----------------|-------------------|-------------|-----------------|--------------------|-------------|-----------------|--------------------|-------------|-----------------|--------------------|-------------|-----------------------------------------------------------------------------------------------------------|
|          | R.T.            | A.                 | D.P.        | R.T.            | A.                | D.P.        | R.T.            | A.                 | D.P.        | R.T.            | A.                 | D.P.        | R.T.            | A.                 | D.P.        |                                                                                                           |
| 1-C1     | 1.94<br>(0.12)  | 25529<br>(51445)   |             | 2.06<br>(0.03)  | 18854<br>(5856)   | e, f,<br>g. | 2.06<br>(0.01)  | 33738<br>(5590)    | e, h,<br>i. | 2.04<br>(0.06)  | 53547<br>(18986)   | f, h,<br>j. | 2.07<br>(0.01)  | 25269<br>(7255)    | g, i,<br>j. | 2-methoxy-ethanol                                                                                         |
| 2-C2     | 3.86<br>(0.03)  | 40346<br>(20248)   | d.          | 3.87<br>(0.03)  | 46689<br>(21178)  | g.          | 3.95<br>(0.09)  | 34018<br>(34063)   |             | 3.94<br>(0.09)  | 29199<br>(40753)   |             | 3.94<br>(0.09)  | 18437<br>(8217)    | d, g.       | Thiirane                                                                                                  |
| 3-C3     | 5.97<br>(0.10)  | 102677<br>(139578) | b, c.       | 5.97<br>(0.09)  | 89269<br>(126787) | f.          | 6.14<br>(0.13)  | 15467<br>(13608)   | b.          | 6.13<br>(0.07)  | 12979<br>(3486)    | c, f.       | --              | --                 |             | Propanoic acid, ethyl ester                                                                               |
| 4-C4     | 12.61<br>(0.09) | 24798<br>(55836)   |             | 12.63<br>(0.04) | 19591<br>(5864)   | g.          | 12.69<br>(0.04) | 16392<br>(8453)    |             | 12.69<br>(0.04) | 26769<br>(18189)   | j.          | 12.71<br>(0.04) | 13415<br>(6804)    | g, j.       | Butanoic acid, 2-methyl-, methyl ester                                                                    |
| 5        | 14.72<br>(0.06) | 179950<br>(154023) | c, d.       | 14.72<br>(0.04) | 113587<br>(94050) | f, g.       | --              | --                 |             | 14.82<br>(0.05) | 26444<br>(23106)   | c, f.       | 14.81<br>(0.04) | 15569<br>(13826)   | d, g.       | Dimethyldisulfide                                                                                         |
| 6-C5     | 19.72<br>(0.09) | 9553<br>(2108)     | b, d.       | --              | --                |             | 19.84<br>(0.08) | 7130<br>(1356)     | b.          | 19.82<br>(0.08) | 8032<br>(2811)     |             | 19.83<br>(0.08) | 6812<br>(943)      | d.          | Butanoic acid, 2-methyl-, ethyl ester                                                                     |
| 7-C6     | 30.14<br>(0.06) | 22483<br>(45752)   |             | 30.13<br>(0.06) | 16363<br>(5726)   | e, g.       | 30.25<br>(0.03) | 11215<br>(5801)    | e.          | 30.24<br>(0.03) | 13882<br>(8658)    |             | 30.24<br>(0.02) | 9213<br>(3919)     | g.          | 3-Hexanone, 5-methyl-                                                                                     |
| 8-C7     | 35.41<br>(0.08) | 9775<br>(2076)     | b, c,<br>d. | --              | --                |             | 35.57<br>(0.03) | 7075<br>(1161)     | b.          | 35.57<br>(0.03) | 7462<br>(2059)     | c.          | 35.56<br>(0.02) | 7940<br>(2096)     | d.          | 3-Heptanone                                                                                               |
| 9-C8     | 36.08<br>(0.09) | 8018<br>(1601)     | b.          | --              | --                |             | 36.23<br>(0.09) | 6586<br>(1313)     | b.          | 36.21<br>(0.10) | 6805<br>(2256)     |             | 36.24<br>(0.02) | 6810<br>(2098)     |             | 2-Octanone                                                                                                |
| 10-C9    | 48.09<br>(0.06) | 9725<br>(2024)     | b, d.       | 48.11<br>(0.05) | 10410<br>(2421)   | e, g.       | 48.17<br>(0.08) | 14765<br>(4105)    | b, e.       | 48.17<br>(0.08) | 30011<br>(55623)   |             | 48.16<br>(0.07) | 14344<br>(3465)    | d, g.       | Not identified                                                                                            |
| 11       | 54.14<br>(0.11) | 10403<br>(2693)    | b, d.       | --              | --                |             | 54.18<br>(0.04) | 13995<br>(2952)    | b.          | 54.17<br>(0.04) | 14774<br>(7340)    |             | 54.15<br>(0.04) | 14641<br>(3457)    | d.          | 6-Nonenoic acid, methyl ester (Octanal)                                                                   |
| 12       | 59.29<br>(0.09) | 111010<br>(222322) | d.          | 59.30<br>(0.06) | 84668<br>(153458) | f, g.       | 59.36<br>(0.04) | 168103<br>(201143) |             | 59.35<br>(0.04) | 302273<br>(255840) | f.          | 59.35<br>(0.03) | 323340<br>(238440) | d, g.       | 2-ethyl-1-Hexanol                                                                                         |
| 13       | 64.02<br>(0.07) | 9273<br>(1674)     | b, c,<br>d. | 64.02<br>(0.07) | 9604<br>(1234)    | e, f,<br>g. | 64.17<br>(0.04) | 11473<br>(1753)    | b, e.       | 64.18<br>(0.04) | 12581<br>(3356)    | c, f.       | 64.17<br>(0.03) | 11034<br>(1462)    | d, g.       | 2-Hexenyl benzoate                                                                                        |
| 14-C10   | 67.18<br>(0.06) | 19993<br>(3883)    | b, c,<br>d. | 67.18<br>(0.06) | 20658<br>(3291)   | e, f,<br>g. | 67.31<br>(0.03) | 12935<br>(1536)    | b, e.       | 67.31<br>(0.04) | 14845<br>(2888)    | c, f.       | 67.30<br>(0.02) | 14429<br>(2331)    | d, g.       | 1-Phenyl-1-butene (1-ethenyl-4-ethyl-Benzene, 1-ethenyl-3-ethyl-Benzene, 1-methyl-4-(2-propenyl)-Benzene) |
| 15-C11   | 68.59<br>(0.07) | 15346<br>(4069)    | b, d.       | 68.60<br>(0.06) | 16455<br>(2832)   | e, f,<br>g. | 68.73<br>(0.05) | 11029<br>(1260)    | b, e,<br>h. | 68.73<br>(0.03) | 12784<br>(2488)    | f, h.       | 68.73<br>(0.02) | 12172<br>(1807)    | d, g.       | 1-Phenyl-1-butene (1-ethenyl-4-ethyl-Benzene, 1-ethenyl-3-ethyl-Benzene, 1-methyl-4-(2-propenyl)-Benzene) |
| 16-C12   | 70.89<br>(0.09) | 8421<br>(1189)     |             | 70.91<br>(0.07) | 8850<br>(1185)    | e.          | 71.08<br>(0.04) | 7600<br>(1047)     | e.          | 71.08<br>(0.03) | 31796<br>(75434)   |             | 71.08<br>(0.03) | 62545<br>(127604)  |             | 3,7-dimethyl-3-Octanol                                                                                    |
| 17       | 71.91<br>(0.11) | 11507<br>(4414)    | b, c,<br>d. | --              | --                |             | 72.02<br>(0.03) | 19162<br>(7885)    | b.          | 72.02<br>(0.04) | 25760<br>(16566)   | c.          | 72.01<br>(0.02) | 23731<br>(10620)   | d.          | 2-Nonen-1-ol (Nonanal)                                                                                    |
| 18-C13   | 79.81<br>(0.07) | 12586<br>(2391)    | b, d.       | 79.82<br>(0.07) | 13369<br>(2263)   | e, g.       | 79.99<br>(0.04) | 9402<br>(1136)     | b, e.       | 79.99<br>(0.03) | 11363<br>(3899)    |             | 79.97<br>(0.02) | 10182<br>(1530)    | d, g.       | 4-ethyl-Benzaldehyde                                                                                      |
| 19       | 82.45<br>(0.08) | 9234<br>(1691)     | b, d.       | 82.44<br>(0.08) | 9489<br>(1650)    | e, g.       | 82.65<br>(0.04) | 6864<br>(811)      | b, e.       | 82.63<br>(0.04) | 8171<br>(2632)     |             | 82.62<br>(0.03) | 7477<br>(1220)     | d, g.       | 3,4-dimethyl-Benzaldehyde                                                                                 |
| 20       | 87.42<br>(0.10) | 9159<br>(2849)     | b.          | 87.42<br>(0.10) | 10775<br>(2610)   | e.          | 87.22<br>(0.04) | 5061<br>(776)      | b, e.       | --              | --                 |             | --              | --                 |             | 2-Methyl-4-tetradecene (isomers)                                                                          |
| 21-      | 88.65           | 7924               | d.          | 88.64           | 9122              | g.          | 88.82           | 36445              |             | 88.82           | 38360              |             | 88.83           | 13851              | d, g.       | Decanal (isomers,                                                                                         |

|     |                  |                |             |                  |                |       |                  |                 |       |                  |                 |       |                  |                 |       |                                                   |
|-----|------------------|----------------|-------------|------------------|----------------|-------|------------------|-----------------|-------|------------------|-----------------|-------|------------------|-----------------|-------|---------------------------------------------------|
| C14 | (0.09)           | (3340)         |             | (0.09)           | (4012)         |       | (0.07)           | (52712)         |       | (0.08)           | (73221)         |       | (0.02)           | (2398)          |       | homologs)                                         |
| 22  | 103.62<br>(0.10) | 8448<br>(1468) | b, d,       | 103.64<br>(0.09) | 8617<br>(1278) | e, g, | 103.82<br>(0.03) | 6849<br>(949)   | b, e, | 103.82<br>(0.03) | 8540<br>(3389)  |       | 103.81<br>(0.03) | 7038<br>(1340)  | d, g, | 3-ethyl-5-(2-ethylbutyl)-<br>Octadecane (isomers) |
| 23  | 160.54<br>(0.08) | 8393<br>(2970) | b, c,<br>d, | 160.56<br>(0.08) | 8994<br>(3189) | f, g, | 160.44<br>(0.04) | 11476<br>(3815) | b,    | 160.43<br>(0.04) | 15905<br>(6750) | c, f, | 160.43<br>(0.03) | 13941<br>(4602) | d, g, | 2,6-<br>Diisopropylnaphthalene                    |
| 24  | --               | --             |             | --               | --             |       | 173.27<br>(0.03) | 24008<br>(5060) | h,    | 173.24<br>(0.08) | 30585<br>(9475) | h,    | 173.28<br>(0.04) | 27760<br>(5113) |       | Not identified                                    |
